# Supplementary material
Source: PubMed Central journal article supplement (PMC2709352)
Supplement: supp_M109.003020_jbc.M109.003020-1.pdf [file supp_M109.003020_jbc.M109.003020-1.pdf]

## SUPPLEMENTAL DATA

Supplemental Table 1. The target sequences for the experimental siRNAs.

| <b>siRNA</b> | <b>Accession#</b> | <b>Target sequence</b> |
|--------------|-------------------|------------------------|
| NEG          |                   | AATTCTCCGAACGTGTCACGT  |
| RRM2.2       | NM_001034         | GCGGGATTAAACAGTCCTTTA  |
| ATM.1        | NM_000051         | AACCATGAGTCTAGTACTTAA  |
| CHEK1.1      | NM_001274         | AACAGTATTTTCGGTATAATAA |
| CHEK2.1      | NM_007194         | ACGCCGTCCTTTGAATAACAA  |
| E2F1.2       | NM_005225         | ACGCTATGAGACCTCACTGAA  |
| ATR.1        | NM_001184         | CAGGCACTAATTGTTCTTCAA  |
